# Supplementary material for: Electrospun hollow cage-like α-Fe2O3 microspheres: synthesis, formation mechanism, and morphology-preserved conversion to Fe nanostructures
Source: Royal Society of Chemistry journal article supplement (doi:10.1039/c4ce01485e), 2014-01-01
Supplement: c4ce01485e1.pdf [file c4ce01485e1.pdf]

## Supporting information:

### Electrospun hollow cage-like $\alpha$ -Fe<sub>2</sub>O<sub>3</sub> microspheres: synthesis, formation mechanism, and the morphology-reserved conversion to Fe nanostructures

*Liqun Wang<sup>a</sup>, Xuegang Lu<sup>a\*</sup>, Chang Han<sup>a</sup>, Ruie Lu<sup>a</sup>, Sen Yang<sup>a</sup>, and Xiaoping Song<sup>a\*</sup>*

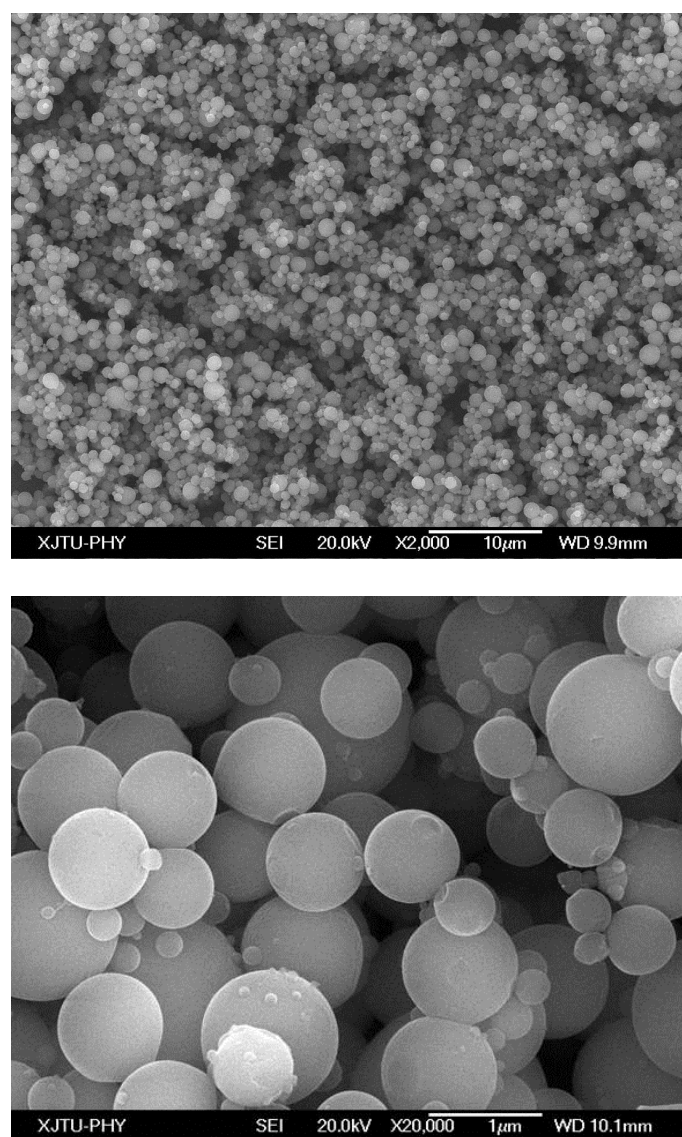

Figure S1 SEM images of precursor PVP/Fe(NO<sub>3</sub>)<sub>3</sub> spheres before calcinations
